# Supplementary material for: Effects of dietary inorganic chromium supplementation on broiler growth performance: a meta-analysis
Source: PeerJ. 2021 Mar 16;9:e11097. doi: 10.7717/peerj.11097 (PMC7977379; doi:10.7717/peerj.11097)
Supplement: Table S3 [file peerj-09-11097-s003.xlsx]

## Sheet: Sheet1
author	year	country	sex	variety	area	chromium (ppb)	n (per treatment)	totle n	adg	sd	se	adfi	sd	se	fcr	sd	se
Kaoud	2010	Egypt	both	Hubbard	10 per m2	0	450	2700	46.6786	0.194524	0.00916994	83.0205	0.425952	0.0200796	1.78	0.00171344	8.07722e-05
Kaoud	2010	Egypt	both	Hubbard	10 per m2	0	450	2700	50.44	0.386667	0.0182276	82.1398	0.318333	0.0150064	1.61	-0.00617248	-0.000290973
Kaoud	2010	Egypt	both	Hubbard	10 per m2	2000	450	2700	54.4726	0.389048	0.0183399	83.146	0.573333	0.0270272	1.58	-0.000376362	-1.77419e-05
Kaoud	2010	Egypt	both	Hubbard	15 per m2	0	450	2700	42.0083	0.671905	0.0316739	77.5807	0.447381	0.0210897	1.86	-0.0188888	-0.000890428
Kaoud	2010	Egypt	both	Hubbard	15 per m2	0	450	2700	47.63	0.387143	0.0182501	81.9017	0.318333	0.0150064	1.8	-0.00729318	-0.000343804
Kaoud	2010	Egypt	both	Hubbard	15 per m2	2000	450	2700	50.2488	0.362857	0.0171052	81.9017	0.318333	0.0150064	1.63	-0.00543487	-0.000256202
Mohammed	2014	Egypt	both	Cobb	no report	0	75	225	45.4507	1.03717	0.119762	76.1895	9.66237	1.11571	1.67	0.259808	0.03
Mohammed	2014	Egypt	both	Cobb	no report	500	75	225	46.3962	0.767051	0.0885714	76.1238	8.36745	0.96619	1.64	0.173205	0.02
Kheiri	2007	Iran	male	Ross 308	no report	0	60	300	50	3.25331	0.42	85.3	11.9288	1.54	1.71	1.46399	0.189
Kheiri	2007	Iran	male	Ross 308	no report	400	60	300	50.2	3.25331	0.42	85.4	11.9288	1.54	1.7	1.46399	0.189
Kheiri	2007	Iran	male	Ross 308	no report	800	60	300	50.4	3.25331	0.42	85.1	11.9288	1.54	1.69	1.46399	0.189
Kheiri	2007	Iran	male	Ross 308	no report	1200	60	300	50.1	3.25331	0.42	85.5	11.9288	1.54	1.71	1.46399	0.189
Kheiri	2007	Iran	male	Ross 308	no report	1600	60	300	51.6	3.25331	0.42	85.4	11.9288	1.54	1.65	1.46399	0.189
Huang	2016	China	female	Cobb 500	12 per m2	0	36	252	35.1	5.7	0.95	65.44	18.84	3.14	1.86	0.06	0.01
Huang	2016	China	female	Cobb 500	12 per m2	400	36	252	35.56	3.66	0.61	64.81	15.3	2.55	1.82	0.24	0.04
Huang	2016	China	female	Cobb 500	12 per m2	2000	36	252	37.27	9.84	1.64	65.09	13.14	2.19	1.75	0.24	0.04
Lu	2018	China	male	Arbor Acres	no report	0	48	432	48.2	2.88208	0.294151	85.7	3.40981	0.348012	1.63854	0.0810925	0.00827647
Lu	2018	China	male	Arbor Acres	no report	400	48	432	49.4	2.88208	0.294151	86.35	3.40981	0.348012	1.60346	0.0810925	0.00827647
Lu	2018	China	male	Arbor Acres	no report	800	48	432	49.1	2.88208	0.294151	85.4	3.40981	0.348012	1.5793	0.0810925	0.00827647
Lu	2018	China	male	Arbor Acres	no report	1600	48	432	48.55	2.88208	0.294151	85.9	3.40981	0.348012	1.61939	0.0810925	0.00827647
Lu	2018	China	male	Arbor Acres	no report	3200	48	432	49.4	2.88208	0.294151	85.2	3.40981	0.348012	1.59112	0.0810925	0.00827647
Moeini	2011	Iran	both	ross 308	no report	0	50	250	39.19	2.95	0.417193	84.79	4.81	0.680237	2.09	0.17	FALSE
Moeini	2011	Iran	both	ross 308	no report	800	50	250	46.46	4.91	0.694379	84.99	2.32	0.328098	1.82	0.17	0.0240416
Moeini	2011	Iran	both	ross 308	no report	1200	50	250	40.2	8.1	1.14551	88.01	5.55	0.784889	2.04	0.24	0.0339411
Toghyani	2012	Iran	male	ross 308	15 in 1.44m2	0	60	420	50.6	5.80948	0.75	96.6	9.29516	1.2	1.9	0.410536	0.053
Toghyani	2012	Iran	male	ross 308	15 in 1.44m2	500	60	420	52.1	5.80948	0.75	101.1	9.29516	1.2	1.94	0.410536	0.053
Toghyani	2012	Iran	male	ross 308	15 in 1.44m2	1000	60	420	53.4	5.80948	0.75	102.1	9.29516	1.2	1.91	0.410536	0.053
Toghyani	2012	Iran	male	ross 308	15 in 1.44m2	1500	60	420	55.1	5.80948	0.75	102.6	9.29516	1.2	1.86	0.410536	0.053
Zha	2009	China	male	Arbor Acres	no report	0	60	240	44.1	1.93649	0.25	84.5	4.72504	0.61	1.92	0.154919	0.02
Zha	2009	China	male	Arbor Acres	no report	500	60	240	44.2	1.93649	0.25	84.4	4.72504	0.61	1.91	0.154919	0.02
Zheng	2016	China	female	Cobb 500	no report	0	36	252	58.02	19.74	3.29	96.42	28.62	4.77	1.63	0.24	0.04
Zheng	2016	China	female	Cobb 500	no report	400	36	252	58.31	9.66	1.61	97.21	14.82	2.47	1.67	0.42	0.07
Zheng	2016	China	female	Cobb 500	no report	2000	36	252	58.25	12.78	2.13	97.36	28.14	4.69	1.67	0.18	0.03
